# Supplementary material for: A co-culture microtunnel technique demonstrating a significant contribution of unmyelinated Schwann cells to the acceleration of axonal conduction in Schwann cell-regulated peripheral nerve development
Source: Royal Society of Chemistry journal article supplement (doi:10.1039/c7ib00051k), 2017-01-01
Supplement: c7ib00051k1.pdf [file c7ib00051k1.pdf]

### Electronic Supplementary Information

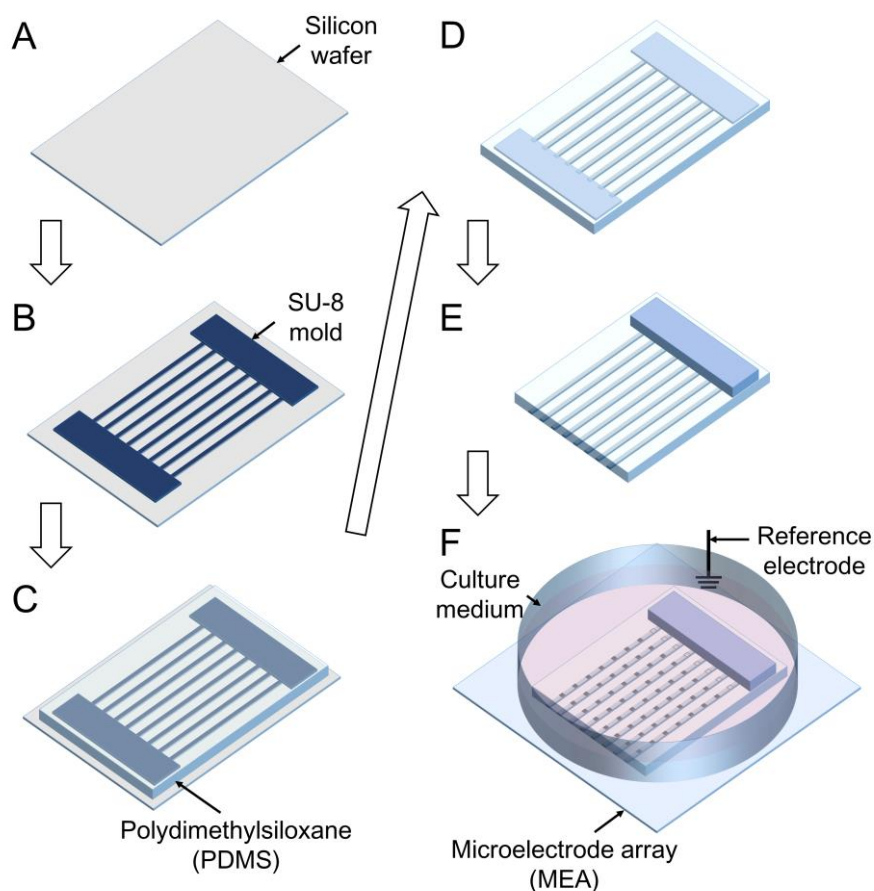

**Supplementary Figure S1** Schematic images of device fabrication process. (A, B) An SU-8 mold was developed on a silicon wafer using photolithography. (C) Polydimethylsiloxane (PDMS) pre-polymer was casted on the mold and cured. (D) The cured PDMS was peeled from the mold. (E) A soma compartment was made on only one side by punching and the other side was cut off. (F) The PDMS chamber was mounted on a microelectrode array. During activity recording, a reference electrode was located in the culture medium.
